# Supplementary material for: Wavelet Analysis Reveals Phenology Mismatch between Leaf Phenology of Temperate Forest Plants and the Siberian Roe Deer Molting under Global Warming
Source: MDPI journal article supplement (doi:10.3390/rs14163901), 2022-08-11
Supplement: s1 [file s1]

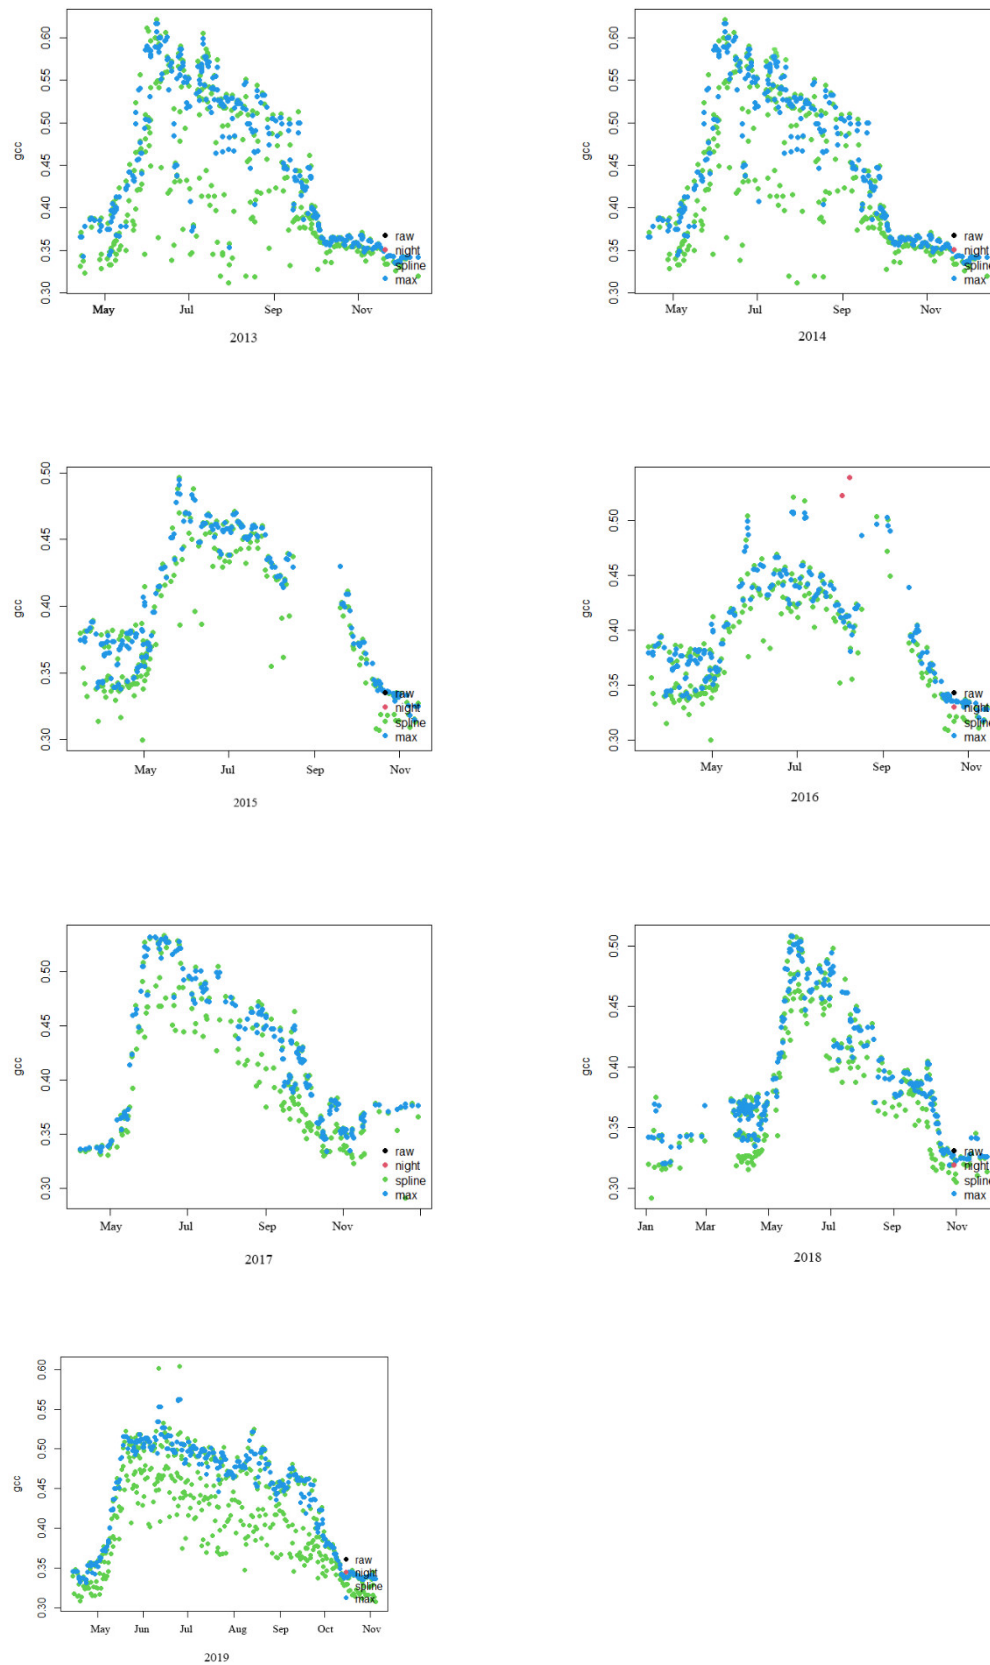

**Figure S1.** Comparison of Max (blue), Spline (green) and Night (red) method to filter raw data (black).

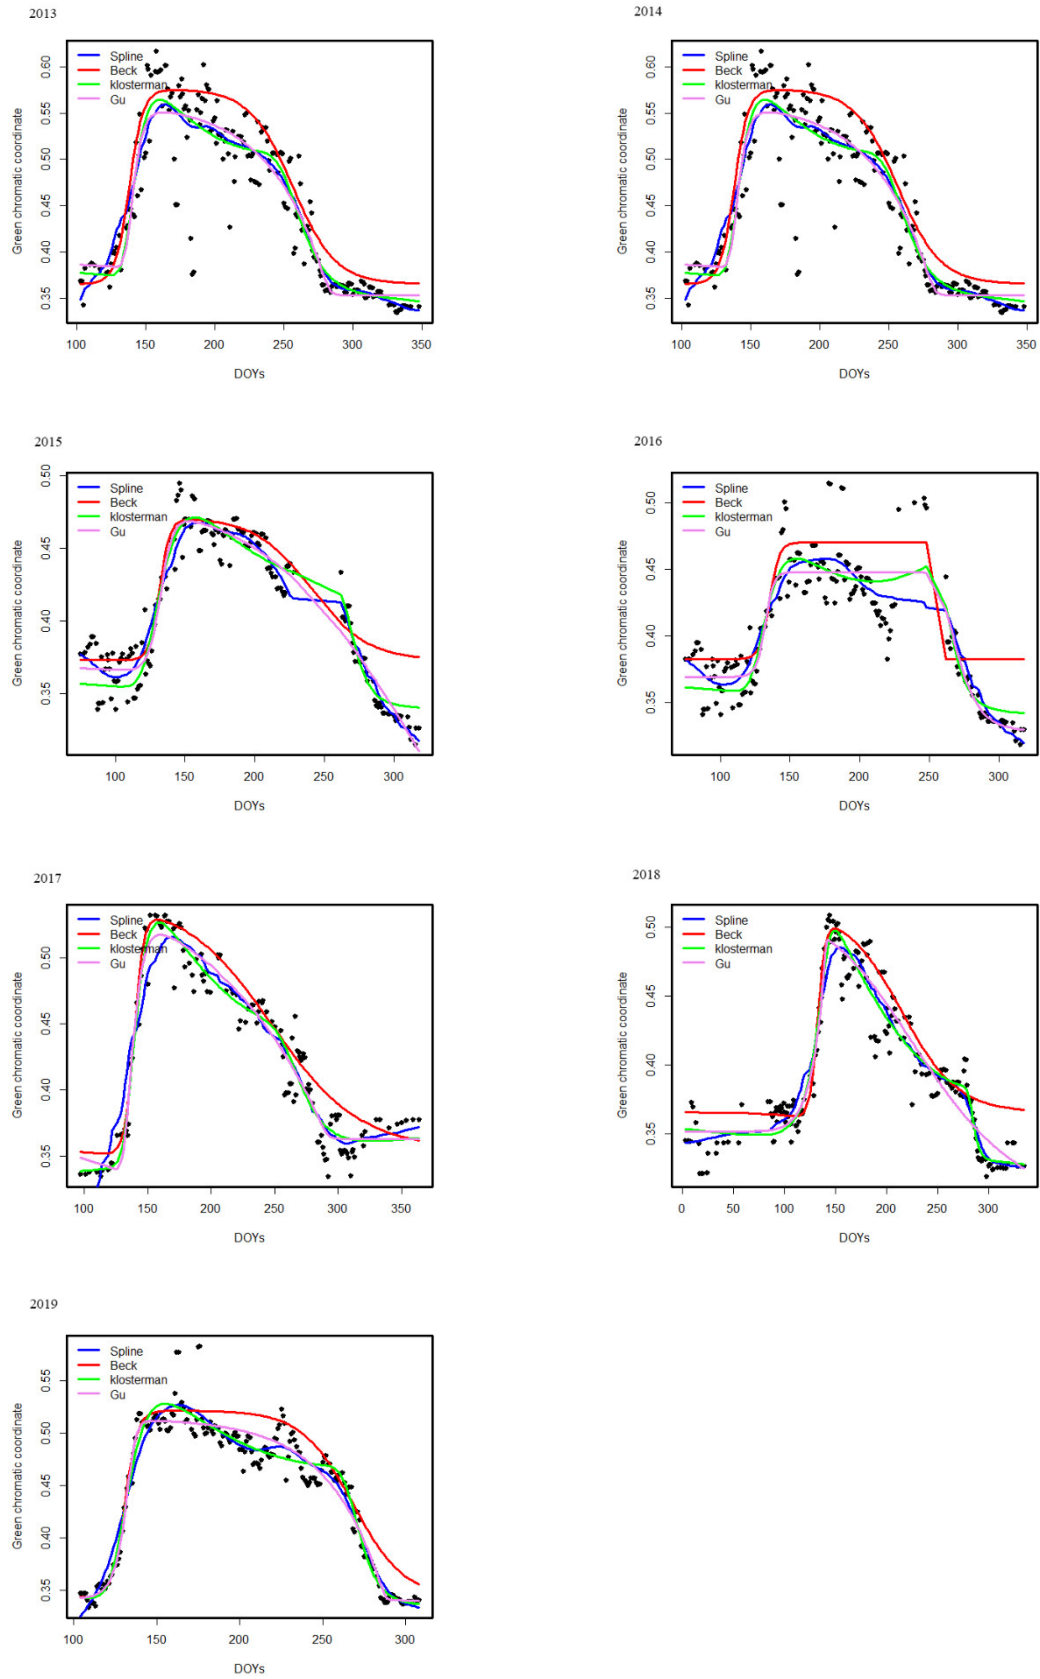

**Figure S2.** Comparison of 4 growth curve fitting methods 2013–2019.

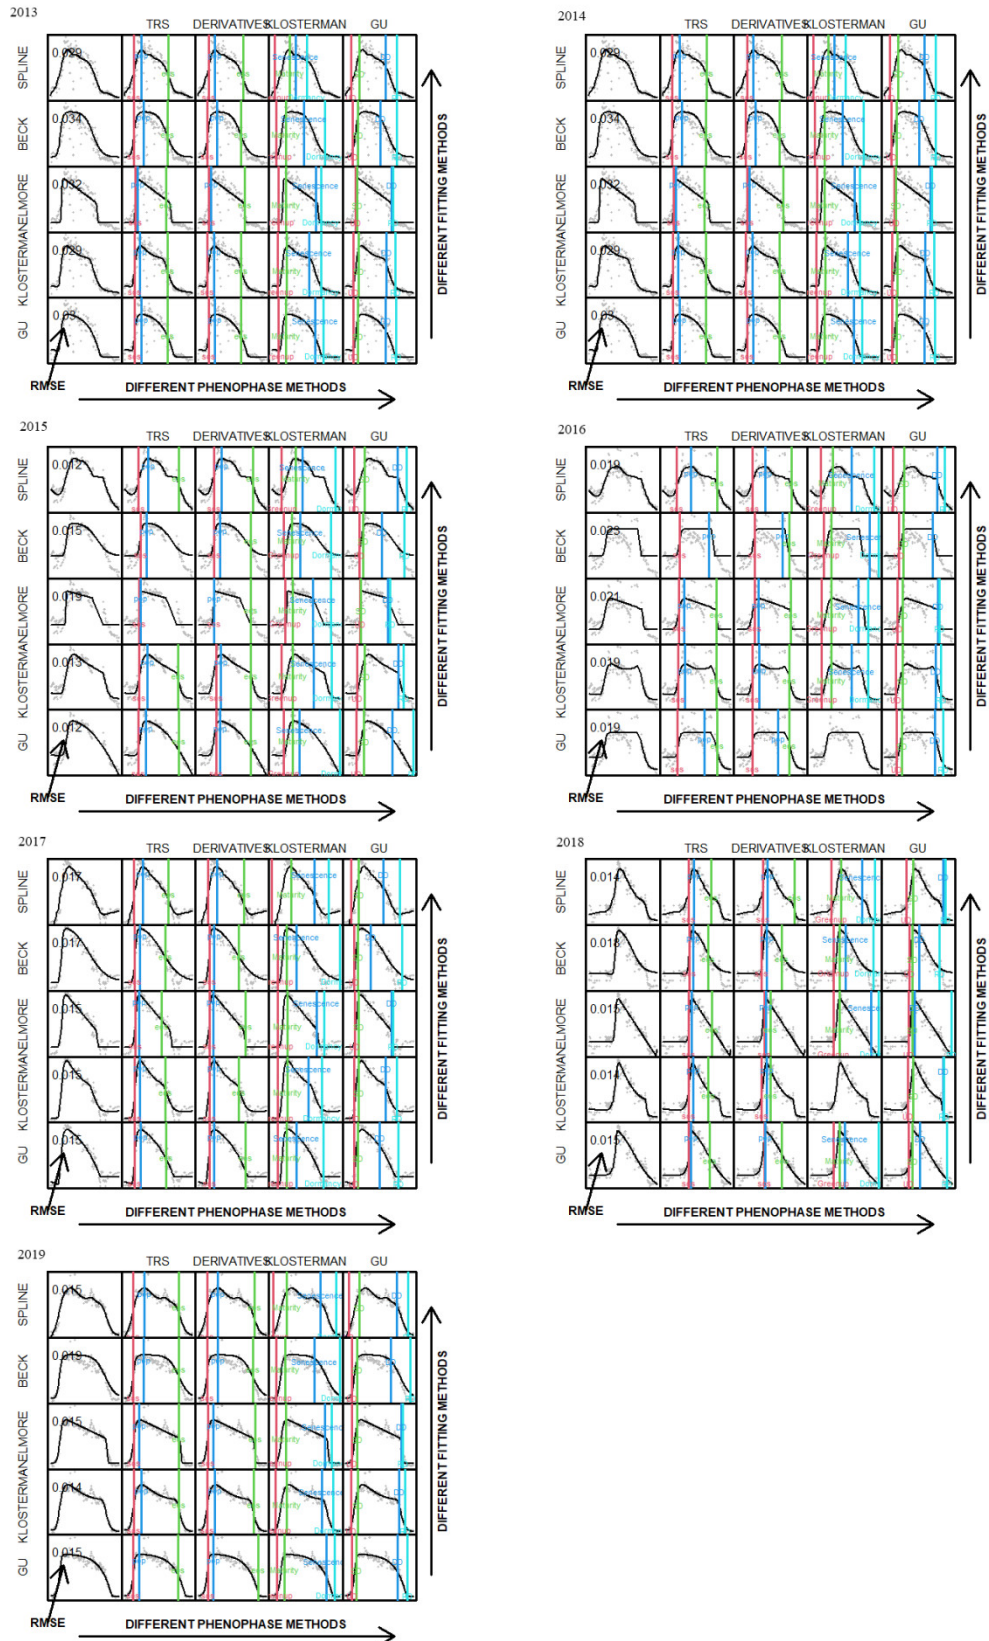

**Figure S3.** Comparison of 4 growth curve fitting methods and parameter extraction methods 2013–2019.

**Table S1.** Meteorological factors used for analysis.

| <b>month-year</b> | <b>Mean<br/>temperature</b> | <b>T max</b> | <b>T min</b> | <b>precipitation</b> | <b>sunshine<br/>duration</b> |
|-------------------|-----------------------------|--------------|--------------|----------------------|------------------------------|
|                   |                             |              | -16.548      |                      |                              |
| Jan-2013          | -11.2774                    | -5.6323      | 4            | 0.1903               | 4.0032                       |
|                   |                             |              | -13.271      |                      |                              |
| Feb-2013          | -8.5071                     | -3.6857      | 4            | 1.3325               | 3.8786                       |
| Mar-2013          | 4.6226                      | 11.0613      | -0.8742      | 1.0165               | 5.5968                       |
| Apr-2013          | 14.3200                     | 19.5833      | 10.3333      | 4.1440               | 3.5567                       |
| May-2013          | 20.7387                     | 27.0129      | 15.7935      | 3.2423               | 6.3323                       |
| Jun-2013          | 20.3833                     | 25.4167      | 16.3333      | 4.2037               | 4.9200                       |
| Jul-2013          | 16.4935                     | 22.3419      | 12.3226      | 3.0129               | 4.9871                       |
| Aug-2013          | 13.5290                     | 20.7419      | 7.3774       | 3.6068               | 6.4129                       |
| Sep-2013          | 5.8867                      | 12.0600      | 0.1967       | 1.3133               | 6.5100                       |
| Oct-2013          | -1.0871                     | 5.1355       | -7.0065      | 0.4581               | 7.0484                       |
|                   |                             |              | -17.390      |                      |                              |
| Nov-2013          | -10.9800                    | -4.0900      | 0            | 0.4003               | 7.1067                       |
|                   |                             | -10.509      | -22.277      |                      |                              |
| Dec-2013          | -16.8258                    | 7            | 4            | 0.6358               | 6.4161                       |
|                   |                             |              | -16.429      |                      |                              |
| Jan-2014          | -11.0581                    | -4.4613      | 0            | 0.4745               | 4.9258                       |
| Feb-2014          | -4.5643                     | 0.6464       | -8.7571      | 0.4646               | 4.5179                       |
| Mar-2014          | 5.1645                      | 12.1903      | -0.8516      | 0.7423               | 6.7097                       |
| Apr-2014          | 13.7933                     | 21.2833      | 8.2600       | 0.1900               | 7.5733                       |
| May-2014          | 19.1000                     | 23.9774      | 15.8742      | 5.5710               | 3.5032                       |
| Jun-2014          | 20.3100                     | 26.3533      | 15.4767      | 4.2073               | 6.7533                       |
| Jul-2014          | 17.3935                     | 23.6935      | 12.6129      | 3.6100               | 5.6839                       |
| Aug-2014          | 12.5032                     | 19.2548      | 6.8484       | 3.4487               | 6.8613                       |
| Sep-2014          | 6.9167                      | 14.1400      | -0.2267      | 1.2040               | 7.6800                       |
| Oct-2014          | -0.3258                     | 6.4419       | -6.5097      | 0.4806               | 7.6581                       |
|                   |                             |              | -14.003      |                      |                              |
| Nov-2014          | -8.1533                     | -1.5700      | 3            | 0.6773               | 6.5033                       |
|                   |                             |              | -18.512      |                      |                              |
| Dec-2014          | -13.5129                    | -6.7065      | 9            | 0.0710               | 4.7613                       |
|                   |                             |              | -19.122      |                      |                              |
| Jan-2015          | -14.7097                    | -9.4258      | 6            | 0.7684               | 3.9000                       |
| Feb-2015          | -1.6964                     | 4.8250       | -7.2536      | 0.1968               | 6.2000                       |
| Mar-2015          | 5.6129                      | 12.4065      | -0.5839      | 1.9939               | 5.4194                       |
| Apr-2015          | 12.6333                     | 20.0833      | 6.7100       | 1.7503               | 6.7567                       |
| May-2015          | 19.0968                     | 25.0161      | 14.3774      | 2.8871               | 7.2742                       |
| Jun-2015          | 20.8500                     | 26.7933      | 16.3400      | 4.0703               | 6.8433                       |
| Jul-2015          | 17.8903                     | 23.8161      | 13.2419      | 2.4300               | 6.4065                       |

|          |          |         |         |        |        |
|----------|----------|---------|---------|--------|--------|
| Aug-2015 | 12.6774  | 18.8516 | 7.6290  | 4.2171 | 4.0097 |
| Sep-2015 | 8.1267   | 15.7367 | 0.8000  | 0.5170 | 7.7633 |
| Oct-2015 | -1.6032  | 4.3806  | -7.1871 | 0.2452 | 7.2903 |
|          |          |         | -18.020 |        |        |
| Nov-2015 | -11.7600 | -4.6367 | 0       | 0.2473 | 6.7800 |
|          |          |         | -21.571 |        |        |
| Dec-2015 | -16.1645 | -9.0677 | 0       | 0.0232 | 5.5871 |
|          |          |         | -17.706 |        |        |
| Jan-2016 | -12.9032 | -7.1065 | 5       | 0.3068 | 5.0226 |
| Feb-2016 | -2.2793  | 2.9690  | -6.6862 | 2.8145 | 3.9724 |
| Mar-2016 | 6.2742   | 13.0710 | 0.0839  | 1.0394 | 6.2516 |
| Apr-2016 | 13.4267  | 20.5200 | 7.9767  | 1.0333 | 7.5867 |
| May-2016 | 20.4484  | 26.0194 | 16.4419 | 3.9329 | 6.3839 |
| Jun-2016 | 20.4433  | 25.2900 | 17.0200 | 5.0100 | 5.3300 |
| Jul-2016 | 18.4323  | 24.7000 | 13.3806 | 3.2265 | 6.7742 |
| Aug-2016 | 13.1194  | 20.5645 | 7.0355  | 2.2271 | 6.4290 |
| Sep-2016 | 3.0800   | 8.7733  | -1.9200 | 0.9617 | 6.4767 |
|          |          |         | -10.148 |        |        |
| Oct-2016 | -4.6742  | 1.0258  | 4       | 0.6755 | 6.7387 |
|          |          |         | -19.206 |        |        |
| Nov-2016 | -13.6900 | -7.4633 | 7       | 0.2720 | 5.8000 |
|          |          | -10.525 | -22.822 |        |        |
| Dec-2016 | -17.2839 | 8       | 6       | 0.0752 | 5.3387 |
|          |          | -10.535 | -20.551 |        |        |
| Jan-2017 | -16.0774 | 5       | 6       | 0.5203 | 5.2194 |
| Feb-2017 | -3.7250  | 0.4643  | -7.1000 | 1.5725 | 2.8179 |
| Mar-2017 | 5.1226   | 11.4968 | -0.5161 | 2.3490 | 6.2968 |
| Apr-2017 | 14.4633  | 20.1000 | 10.3333 | 5.0303 | 5.0367 |
| May-2017 | 19.2968  | 24.6419 | 15.1032 | 4.2229 | 5.3613 |
| Jun-2017 | 20.2800  | 25.5200 | 16.1433 | 3.8603 | 5.8367 |
| Jul-2017 | 16.4226  | 22.0290 | 11.9968 | 1.2590 | 5.6645 |
| Aug-2017 | 13.3548  | 19.9968 | 7.2000  | 1.8916 | 7.3935 |
| Sep-2017 | 5.0133   | 11.9100 | -1.3233 | 1.7610 | 7.1500 |
| Oct-2017 | -3.9226  | 1.8194  | -9.6258 | 0.7232 | 6.0065 |
|          |          |         | -19.246 |        |        |
| Nov-2017 | -13.3367 | -6.6000 | 7       | 0.2743 | 6.2333 |
|          |          | -10.887 | -24.087 |        |        |
| Dec-2017 | -18.3194 | 1       | 1       | 0.0035 | 6.2581 |
|          |          |         | -21.122 |        |        |
| Jan-2018 | -15.7129 | -8.8290 | 6       | 0.0077 | 6.1581 |
| Feb-2018 | -3.6571  | 2.4536  | -9.0857 | 1.0539 | 5.2536 |
| Mar-2018 | 5.6774   | 13.3419 | -0.8516 | 0.4265 | 6.0194 |
| Apr-2018 | 13.3233  | 20.7533 | 6.7333  | 0.3473 | 7.5433 |
| May-2018 | 19.8355  | 25.7161 | 15.2226 | 2.3648 | 6.2484 |

|          |          |         |         |        |        |
|----------|----------|---------|---------|--------|--------|
| Jun-2018 | 20.4267  | 25.4033 | 16.2967 | 0.8407 | 6.4233 |
| Jul-2018 | 17.2452  | 22.9484 | 12.5065 | 2.8877 | 5.4129 |
| Aug-2018 | 11.0774  | 17.0613 | 5.8129  | 2.6784 | 6.1774 |
| Sep-2018 | 5.2433   | 11.6367 | -1.0333 | 1.0180 | 6.7333 |
| Oct-2018 | -3.8710  | 1.8290  | -9.5097 | 0.0671 | 7.1000 |
|          |          |         | -14.560 |        |        |
| Nov-2018 | -8.4867  | -1.6200 | 0       | 0.0350 | 7.4233 |
|          |          | -12.151 | -22.845 |        |        |
| Dec-2018 | -17.8935 | 6       | 2       | 0.0081 | 6.0387 |
|          |          |         | -19.154 |        |        |
| Jan-2019 | -14.5129 | -8.6161 | 8       | 0.3919 | 3.9677 |
| Feb-2019 | -3.3393  | 2.1286  | -7.6500 | 0.7289 | 5.0714 |
| Mar-2019 | 4.4806   | 10.7710 | -0.5355 | 2.3297 | 5.9323 |
| Apr-2019 | 13.9600  | 20.7733 | 8.6433  | 0.4603 | 7.1467 |
| May-2019 | 19.9226  | 25.2452 | 15.4710 | 2.8903 | 6.5000 |
| Jun-2019 | 20.5667  | 24.9700 | 17.4500 | 3.3667 | 5.0800 |
| Jul-2019 | 20.7323  | 27.2581 | 14.6968 | 1.2590 | 8.3677 |
| Aug-2019 | 13.2387  | 19.4774 | 7.4645  | 3.1471 | 5.2548 |
| Sep-2019 | 3.0933   | 8.2033  | -1.2633 | 1.5443 | 5.8333 |
|          |          |         | -12.225 |        |        |
| Oct-2019 | -6.4097  | -0.6871 | 8       | 0.8139 | 6.2871 |
|          |          |         | -17.966 |        |        |
| Nov-2019 | -12.4633 | -6.4033 | 7       | 0.7117 | 6.4267 |
|          |          |         | -21.625 |        |        |
| Dec-2019 | -15.9581 | -8.9710 | 8       | 0.0229 | 6.0581 |

**Table S2.** Number of images and videos collected of Siberian roe deer.

| Year  | Total photos | Effective photos | Total videos | Effective videos | Effective molting events |
|-------|--------------|------------------|--------------|------------------|--------------------------|
| 2013  | 600          | 179              | 153          | 134              | 48                       |
| 2014  | 1099         | 225              | 288          | 62               | 58                       |
| 2015  | 1822         | 196              | 400          | 151              | 64                       |
| 2016  | 1965         | 256              | 597          | 171              | 87                       |
| 2017  | 2036         | 215              | 530          | 138              | 84                       |
| 2018  | 3047         | 260              | 612          | 117              | 80                       |
| 2019  | 1878         | 160              | 339          | 143              | 88                       |
| Total | 12447        | 1491             | 2919         | 916              | 509                      |

**Table S3.** Data of Siberian roe deer molting events in study area.

| Season | 2013 | 2014 | 2015 | 2016 | 2017 | 2018 | 2019 |
|--------|------|------|------|------|------|------|------|
| Spring | 25   | 25   | 30   | 48   | 51   | 43   | 49   |
| Autumn | 23   | 33   | 34   | 39   | 33   | 37   | 39   |

**Table 4.** Length of period (LP) of forest leaf phenology (FLP).

| Forest Leaf Phenology   | Meteorological Factors | Length of Optimal Period (Day) | R     | p      |
|-------------------------|------------------------|--------------------------------|-------|--------|
| Start of growing season | Mean temperature       | 42                             | 0.73  | < 0.01 |
|                         | Sunshine duration      | 82                             | 0.23  | < 0.05 |
|                         | precipitation          | 25                             | 0.26  | > 0.05 |
| End of growing season   | Mean temperature       | 76                             | -0.65 | < 0.01 |
|                         | Sunshine duration      | 16                             | 0.21  | > 0.05 |
|                         | precipitation          | 132                            | 0.25  | < 0.05 |
